# Supplementary material for: Jailed in the mountains: Genetic diversity and structure of an endemic newt species across the Pyrenees
Source: PLoS One. 2018 Aug 2;13(8):e0200214. doi: 10.1371/journal.pone.0200214 (PMC6071966; doi:10.1371/journal.pone.0200214)
Supplement: S1 Table — List and codification of environmental variables from the BIOCLIM dataset. Units expressed and mean, median, minimum and maximum values for the 44 Calotriton asper populations. Temperature data is in units °C *10 with a 0.1°C precision. (XLSX) [file pone.0200214.s001.xlsx]

## Sheet: Supp
Code	Environmental variables	Units	Min	Median	Mean	Max
BIO1	Annual Mean Temperature	ºC	15	76.5	76.9318	123
BIO2	Mean Diurnal Range (Mean of monthly (max temp - min temp))	ºC	71	90	88	104
BIO3	Isothermality (BIO2/BIO7) (* 100)	%	32	36	35.8864	42
BIO4	Temperature Seasonality (standard deviation *100)	%	5188	5415	5441.27	5853
BIO5	Max Temperature of Warmest Month	ºC	139	212.5	211.159	260
BIO6	Min Temperature of Coldest Month	ºC	-83	-30.5	-29.9773	11
BIO7	Temperature Annual Range (BIO5-BIO6)	ºC	221	241.5	241.136	259
BIO8	Mean Temperature of Wettest Quarter	ºC	0	78.5	74.4318	142
BIO9	Mean Temperature of Driest Quarter	ºC	-7	98.5	96.3409	197
BIO10	Mean Temperature of Warmest Quarter	ºC	87	146	148.705	197
BIO11	Mean Temperature of Coldest Quarter	ºC	-46	12	10.4091	51
BIO12	Annual Precipitation	mm	702	986.5	1023.2	1404
BIO13	Precipitation of Wettest Month	mm	80	103	108.795	147
BIO14	Precipitation of Driest Month	mm	38	57	62.5455	94
BIO15	Precipitation Seasonality (Coefficient of Variation)	%	12	14	15	21
BIO16	Precipitation of Wettest Quarter	mm	205	281	294.682	396
BIO17	Precipitation of Driest Quarter	mm	145	207.5	216.659	311
BIO18	Precipitation of Warmest Quarter	mm	145	227	231.636	311
BIO19	Precipitation of Coldest Quarter	mm	152	234	244.932	337
